# Supplementary material for: A programmed terminal extension strategy to light up multiple beacons for DNA and cellular telomerase detection
Source: Royal Society of Chemistry journal article supplement (doi:10.1039/c7cc02515g), 2017-01-01
Supplement: c7cc02515g1.pdf [file c7cc02515g1.pdf]

## Supporting Information

### **A programmed terminal extension strategy to light up multiple beacons for DNA and cellular telomerase detection**

Yucai Yang<sup>a</sup>, Chao Li<sup>b</sup>, Xiaolu Hu<sup>b</sup>, Yi Yang<sup>b</sup>, Yongmei Yin<sup>\*a</sup> and Zhaoxia Wang<sup>\*c</sup>

<sup>a</sup>Department of Oncology, The First Affiliated Hospital of Nanjing Medical University, Nanjing  
210029, PR China. Email: ym.yin@hotmail.com

<sup>b</sup>State Key Laboratory of Pharmaceutical Biotechnology, Department of Biochemistry, Nanjing  
University, Nanjing 210093, PR China.

<sup>c</sup>Department of Oncology, The Second Affiliated Hospital of Nanjing Medical University,  
Nanjing 210011, PR China. Email: wangzhaoxia@njmu.edu.cn

## Experimental section

### Reagents and materials.

Nanopure water (18.2 MΩ; Millipore Co., USA) was used in all experiments. Hydrogen tetrachloroaurate (III) (HAuCl<sub>4</sub>·3H<sub>2</sub>O), 99.99%, sodium citrate dihydrate (Na<sub>3</sub>C<sub>6</sub>H<sub>5</sub>O<sub>7</sub>·2H<sub>2</sub>O), 99%, and tris(2-carboxyethyl)phosphine (TCEP) were purchased from Alfa Aesar and used without further purification. Terminal deoxynucleoside transferase (TdT) was purchased from Beyotime Biotechnology Co. Ltd. (Nantong, China). RIPA lysis buffer was obtained from New Cell & Molecular Biotech (Suzhou, China). APure telomerase was obtained from commercial ELISA kit (Yibang Biotechnology; Suzhou, China). Other chemicals were purchased from Sigma-Aldrich and used as received without any further purification. All oligonucleotides were synthesized and HPLC purified by Sangon Biotechnology Co. Ltd. (Shanghai, China). The sequences were as follows: (1) 5'-GAGCATACATAGGGTTTCTC-3', (1') 5'-GAGCATACATGGGGTTTCTC-3' (one-base mismatch), (1'') 5'-GAGCATACGCAGGGTTTCTC-3' (two-base mismatch), (1''') CATTCGTCTTAGAGAGCTAC (random sequence), (2) 5'-GAGAAACCCTATGTATGCTCTTTT-(CH<sub>2</sub>)<sub>6</sub>-SH-3', (3) 5'-TAMRA-GCTAAAAAAAAAATTAGC-(CH<sub>2</sub>)<sub>6</sub>-SH-3', (4) 5'-(CH<sub>2</sub>)<sub>6</sub>-SH-AATCCGTCGAGCAGAGTT-3', (5) 5'-TAMRA-CGTTACCCTAACCCTAACGTTTT-(CH<sub>2</sub>)<sub>6</sub>-SH-3', (6) 5'-

AAAAAAAAAAAAAAAAAAAAA-(CH<sub>2</sub>)<sub>6</sub>-SH-3'.

### **Preparation of AuNPs.**

Citrate-capped AuNPs with an average diameter of 13 nm were synthesized by the citrate reduction method. Briefly, sodium citrate (5 mL, 38.8 mM) was added rapidly to boiling solution of HAuCl<sub>4</sub> (50 mL, 1 mM) with vigorously stirring, and then the color of the solution changed quickly from pale yellow to deep red. Before slowly cooling to room temperature, the solution was boiled while stirring for additional 15 min to ensure complete reaction. The concentration of AuNPs solutions was determined to be 11 nM using the absorbance values at 520 nm with extinction coefficient of  $2.7 \times 10^8 \text{ M}^{-1} \text{ cm}^{-1}$ .

### **Preparation of DNA-modified AuNPs.**

The (2)/(3)-modified AuNPs were synthesized by incubating the prepared AuNPs colloid with TCEP activated strands (2) and (3) (the final concentration 3  $\mu\text{M}$ , molar ratio = 1:2) at room temperature for 8 h. Repeat was conducted for a total of six salting steps with at least 30 min intervals between the steps to reach a final salt concentration of 0.2 M NaCl. To remove the excess DNA, the solution was centrifuged for 30 min at 13000 rpm after the salt aging process. The red precipitate was washed and re-centrifuged, then dispersed in 1 mL solution (20 mM Tris-HCl buffer with 100 mM NaCl at pH 7.2). The solution was stored at 4 °C for use. The (4)(5)-DNA-modified AuNPs were synthesized using the same method.

### **Cell culture and cellular protein extraction.**

All of cell lines were obtained from Cell Bank at the Chinese Academy of Sciences (Shanghai, China). They were all seeded in DMEM medium (Gibco, Grand Island, NY) supplemented with 10% fetal bovine serum (Gibco, Grand Island, NY), penicillin (100 mg mL<sup>-1</sup>), and streptomycin (100 mg mL<sup>-1</sup>) at 37 °C in a 5% CO<sub>2</sub> atmosphere. Cells were collected in the exponential phase of growth, and 10 million cells were dispensed in a 1.5 mL EP tube, washed twice with ice-cold PBS (pH 7.4) solution and then resuspended in 100  $\mu\text{L}$  of ice-cold CHAPS lysis buffer (10 mM Tris-HCl, pH 7.5, 1 mM MgCl<sub>2</sub>, 1 mM EGTA, 0.1 mM PMSF, 5 mM mercaptoethanol, 0.5% (w/v) CHAPS, 10% (v/v) glycerol). The solution was incubated on ice for 30 min and centrifuged for 20 min at 12000 rpm, 4 °C. Without disturbing the pellet, the cleared lysate was carefully transferred to a fresh RNase-free EP tube, immediately use for telomerase assay or frozen at -80°C.

### **DNA detection.**

The analyses were performed in a reaction volume of 200  $\mu\text{L}$  that included phosphate buffer solution, 10 mM, pH = 7.4, and 200 mM NaCl. The sensing modules: (2)/(3)-AuNPs (50 pM) and different concentrations of the target (4) were reacted for 30 min and then subjected to centrifugation. Then, the precipitate was dispersed in 50  $\mu\text{L}$  TdT-containing buffer (1mM dTTP, 200 mM potassium cacodylate, 5 U of TdT, 0.05% (v/v) Triton X-100, and 125 mM Tris, pH 7.2) and incubated at 37 °C for 1 h to achieve signal production and amplification.

### **Telomerase detection.**

The analyses were performed in an extension reaction volume of 200  $\mu\text{L}$  that included 20 mM Tris-HCl, 1.5 mM  $\text{MgCl}_2$ , 100 mM KCl, 0.005% Tween 20, 1 mM EGTA, 200  $\mu\text{M}$  dNTP, BSA 0.1 mg  $\text{mL}^{-1}$ , pH 8.0. The sensing modules: (4)/(5)-AuNPs (50 pM) and different concentrations of telomerase were reacted at 37 °C for 40 min, which allows telomerase extension and strand hybridization. Telomerase extracts were diluted in lysis buffer with respective number of cells. The extracts with different cell counts (5  $\mu\text{L}$ , corresponding to  $0\text{--}2 \times 10^6$  cells) were added to 185  $\mu\text{L}$  of extension reaction solution, then add 10  $\mu\text{L}$  AuNPs probe. Then the solution was incubated at 37°C for 40 min. For negative control experiments, telomerase extracts were heated at 95 °C for 10 min.

### **Fluorescence measurements.**

All the fluorescence measurements were carried out on a F-7000 fluorometer with excitation at 547 nm and emission at 575 nm for the hairpin fluorescence probes labeled by TAMRA as a fluorophore. When the samples were excited at 547 nm, a slit width of 5 nm, the emission was scanned from 560 to 620 nm, the scanning speed was 1200 nm/min for all other experiments.

### **In Situ Imaging of Intracellular Telomerase Activity.**

A volume of 100  $\mu\text{L}$  of  $1 \times 10^6 \text{ mL}^{-1}$  cells (MCF-7, HeLa, A549, MDA-MB-231 or HL-7702) were seeded in each confocal dish for 24 h. After incubation with 20  $\mu\text{L}$  probe at 37 °C for 2h, the cells were and sent for fluorescent confocal imaging or flow cytometric detection.

## **Results and discussion**

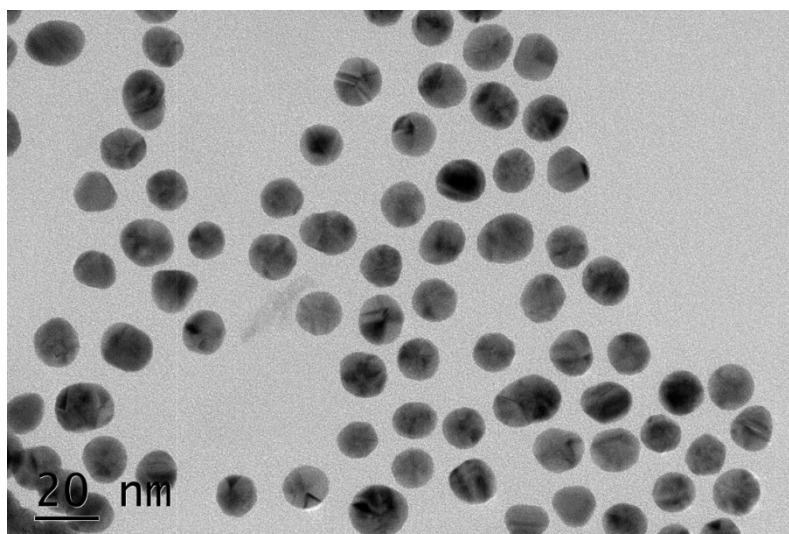

**Fig. S1.** The synthesized DNA-modified gold nanoparticle.

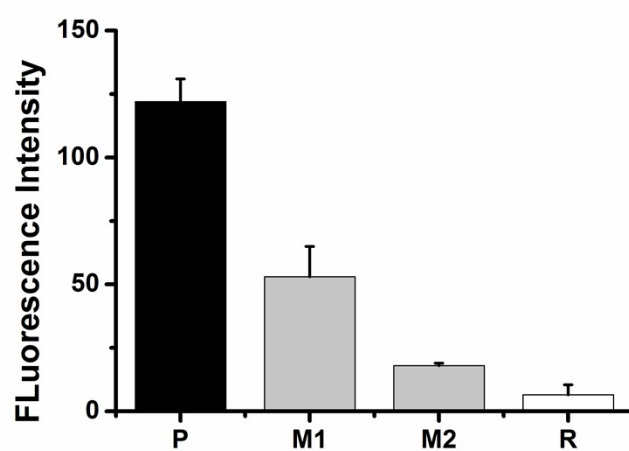

**Fig. S2.** Response of the proposed assay to its perfectly complementary target and mismatched targets (P: perfectly complementary target, M1: one-base mutant, M2: two-base mutant, R: random DNA strand).

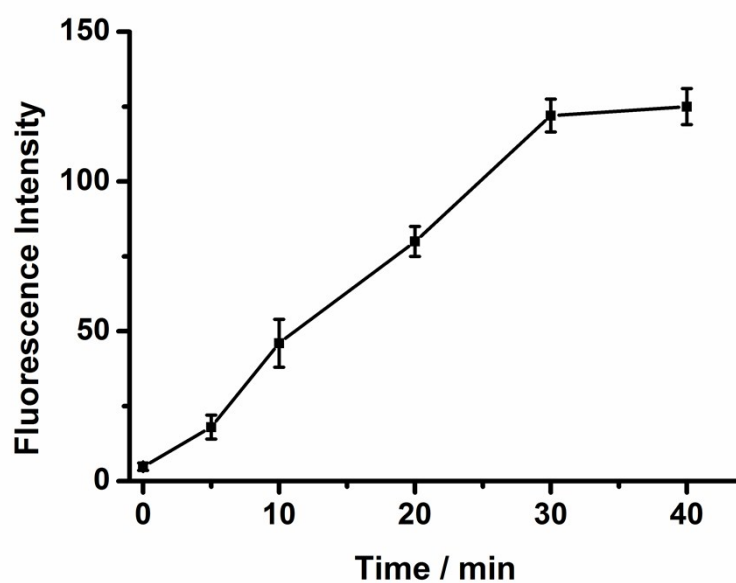

**Fig. S3.** Optimization hybridization time of target (1) onto the (2)/(3) modified AuNPs.

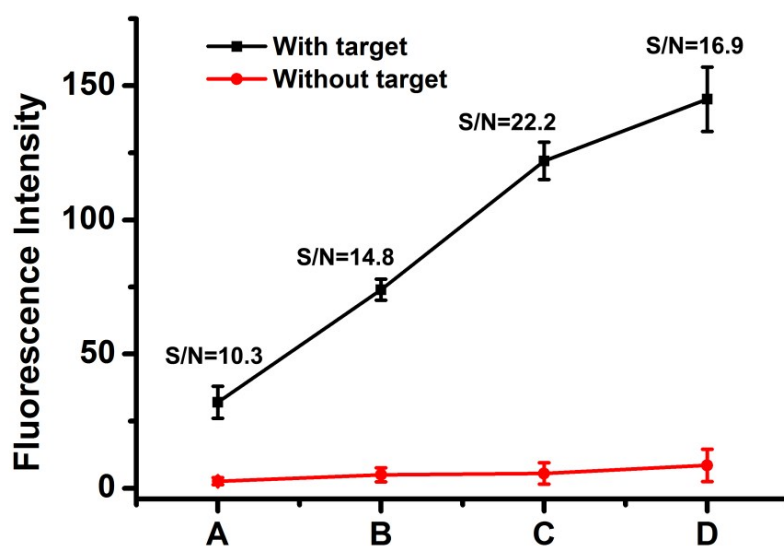

**Fig. S4.** Optimization of the molar ratio of strand (2) and (3) modified onto the AuNPs (A: 1:0.5, B: 1:1, C: 1:2, and D: 1:3).

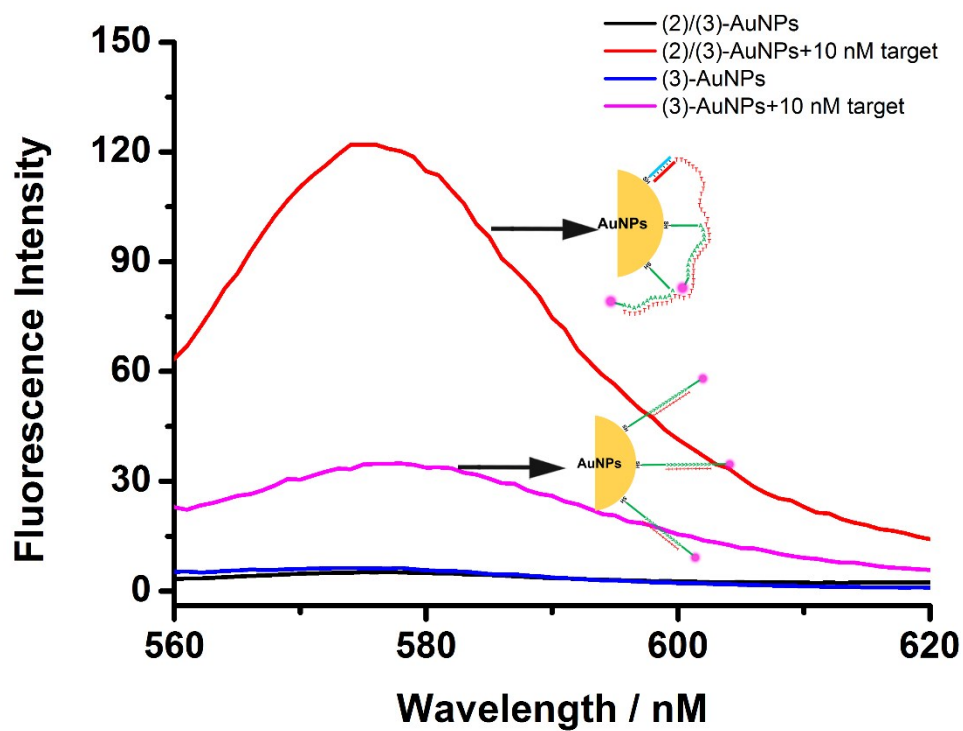

**Fig. S5.** Comparison of the proposed nanoprobe and strand (3) modified AuNPs which both nanoparticles are responded to 10 nM target.

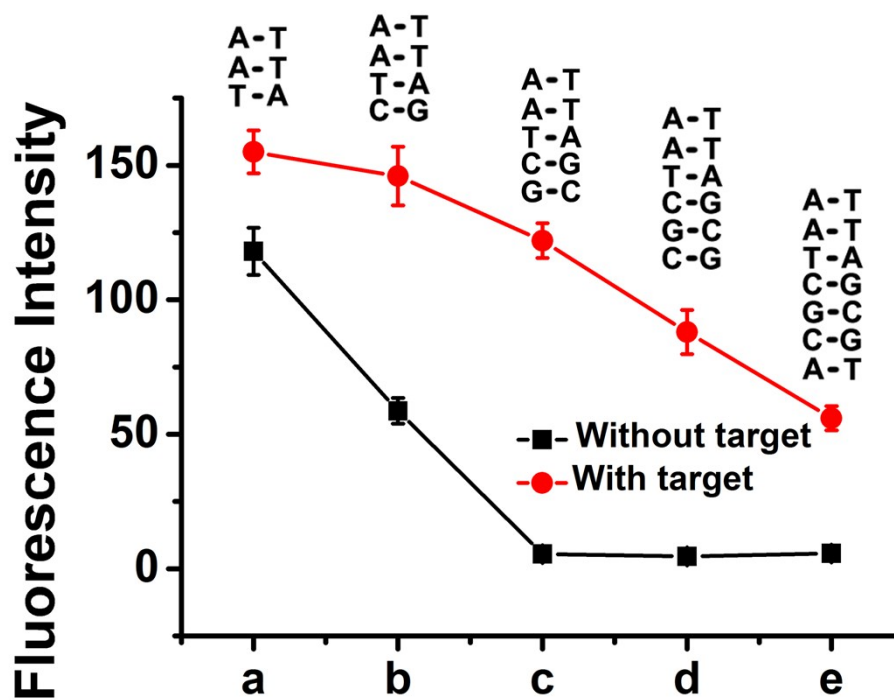

**Fig. S6.** Optimization of the proposed assay through adjusting the stem sequence of probe (3).

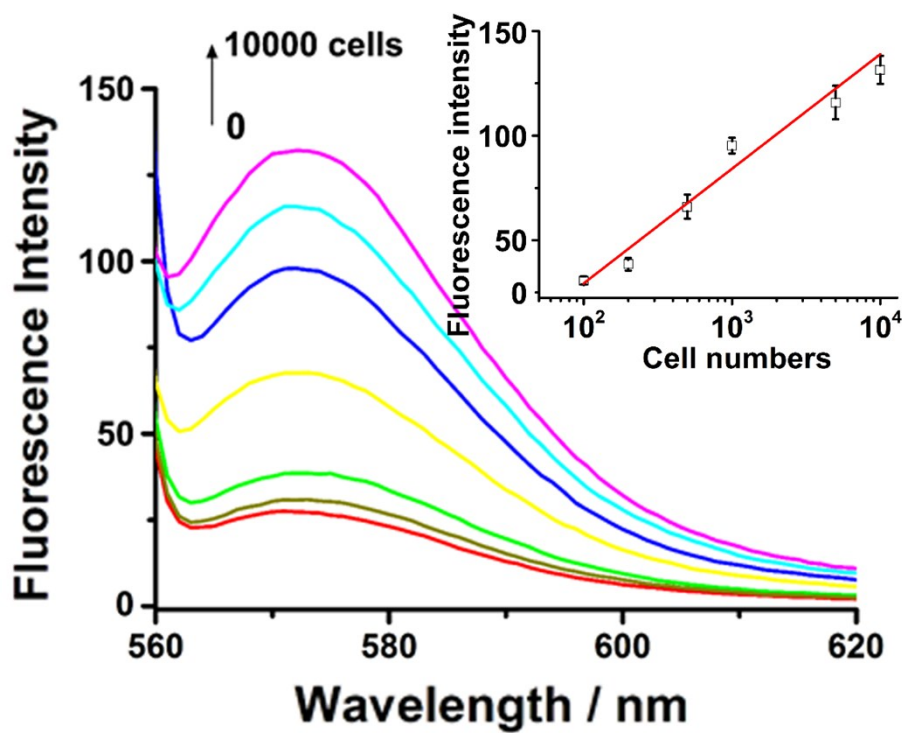



**Fig. S7.** Detection of telomerase extracted from cancer cell using the proposed (4)/(5)-AuNPs (from bottom to top: 0, 100, 200, 500, 1000, 5000, 10000 cells).

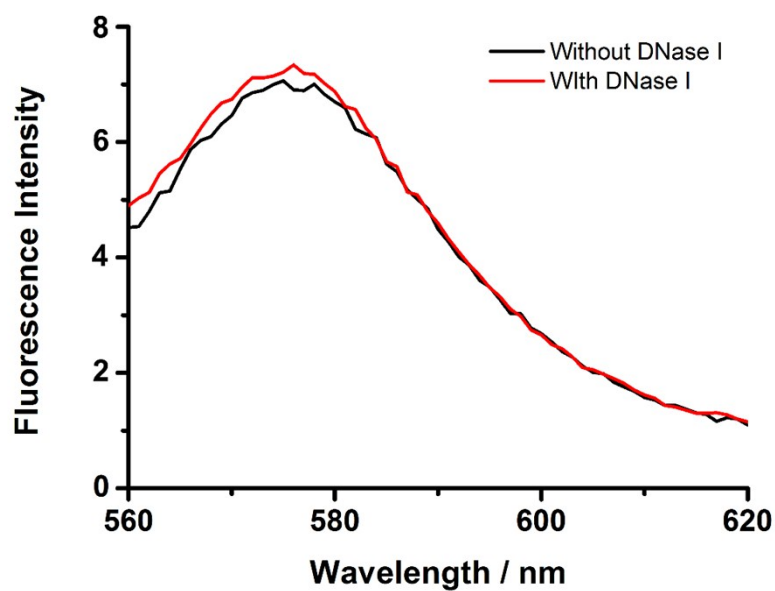

**Fig. S8.** The stability of the proposed nanoprobe after nuclease treatment for 2 h.

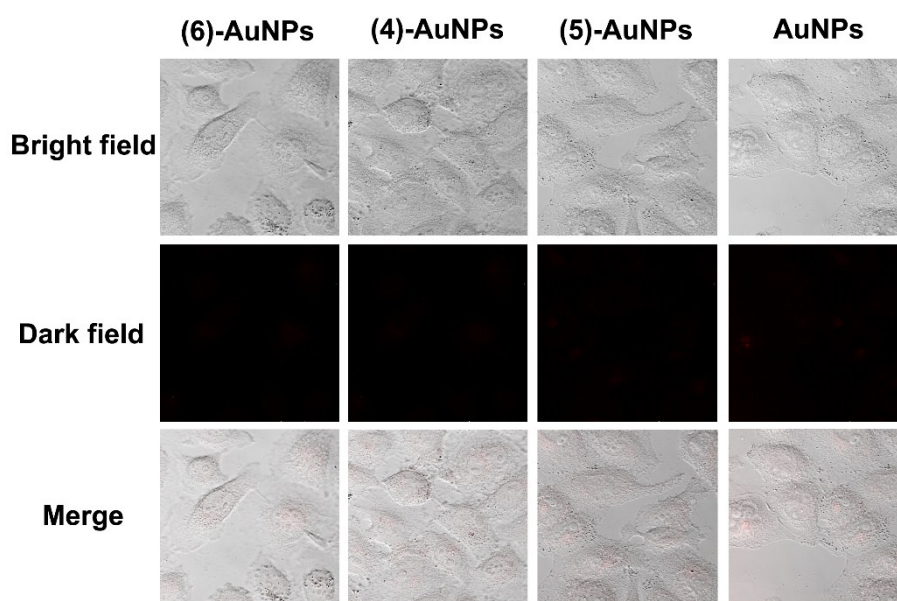

**Fig. S9.** Control experiments of the proposed nanoprobe for cellular telomerase

detection.

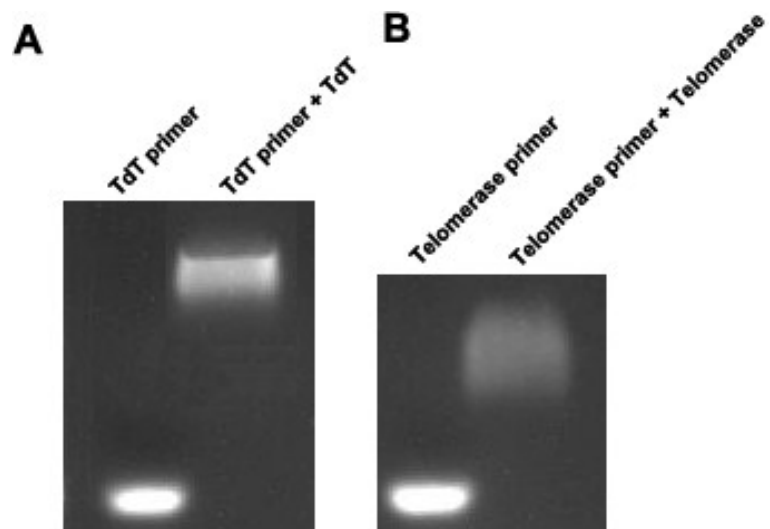

**Fig. S10.** Gel electrophoresis results of the primer extended by TdT and telomerase.

**Table S1.** Performance comparisons between the proposed assay and previous literatures for telomerase detection.

| Assay                             | LOD                   | Reaction step | Detection range                        | Cellular detection              | Ref.      |
|-----------------------------------|-----------------------|---------------|----------------------------------------|---------------------------------|-----------|
| Electrochemistry                  | 10 <sup>3</sup> cells | One step      | 10 <sup>3</sup> -10 <sup>5</sup> cells | No                              | 1         |
| Surface enhanced Raman scattering | 1 cell/mL             | Two steps     | 1-10 <sup>4</sup> cells/mL             | No                              | 2         |
| Gel electrophoresis               | 5 cells               | Four steps    | 10-100 cells                           | No                              | 3         |
| Fluorescence                      | 5 cells               | Three steps   | 0-1000 cells                           | No                              | 4         |
| Fluorescence                      | Single cell analysis  | Two steps     | -                                      | Yes (Lipofectamine required)    | 5         |
| Fluorescence                      | Single cell analysis  | One step      | 10 <sup>2</sup> -10 <sup>4</sup> cells | Yes (No lipofectamine required) | This work |

1. W. Yang, X. Zhu, Q. Liu, Z. Lin, B. Qiu and G. Chen, *Chem. Commun.*, 2011, **47**, 3129-3131.
2. S. Zong, Z. Wang, H. Chen and Y. Cui, *Small*, 2013, **9**, 4215-4220.
3. Y. Xiao, K. Y. Dane, T. Uzawa, A. Csordas, J. Qian, H. T. Soh, P. S. Daugherty, E. T. Lagally, A. J. Heeger and K. W. Plaxco, *JACS*, 2010, **132**, 15299-15307.
4. H.-b. Wang, S. Wu, X. Chu and R.-Q. Yu, *Chem. Commun.*, 2012, **48**, 5916-5918.
5. R. Qian, L. Ding, L. Yan, M. Lin and H. Ju, *Anal. Chem.*, 2014, **86**, 8642-8648.
